# Supplementary material for: UV-Vis Spectroelectrochemistry of Oleuropein, Tyrosol, and p-Coumaric Acid Individually and in an Equimolar Combination. Differences in LC-ESI-MS2 Profiles of Oxidation Products and Their Neuroprotective Properties
Source: PubMed Central journal article supplement (PMC6995624; doi:10.3390/biom9120802), 2019-11-28

1 **Supplementary Materials:** The following are available online at [www.mdpi.com/xxx/s1](http://www.mdpi.com/xxx/s1),

2 **Figure S1:** Total ion current of Mix oxidized.

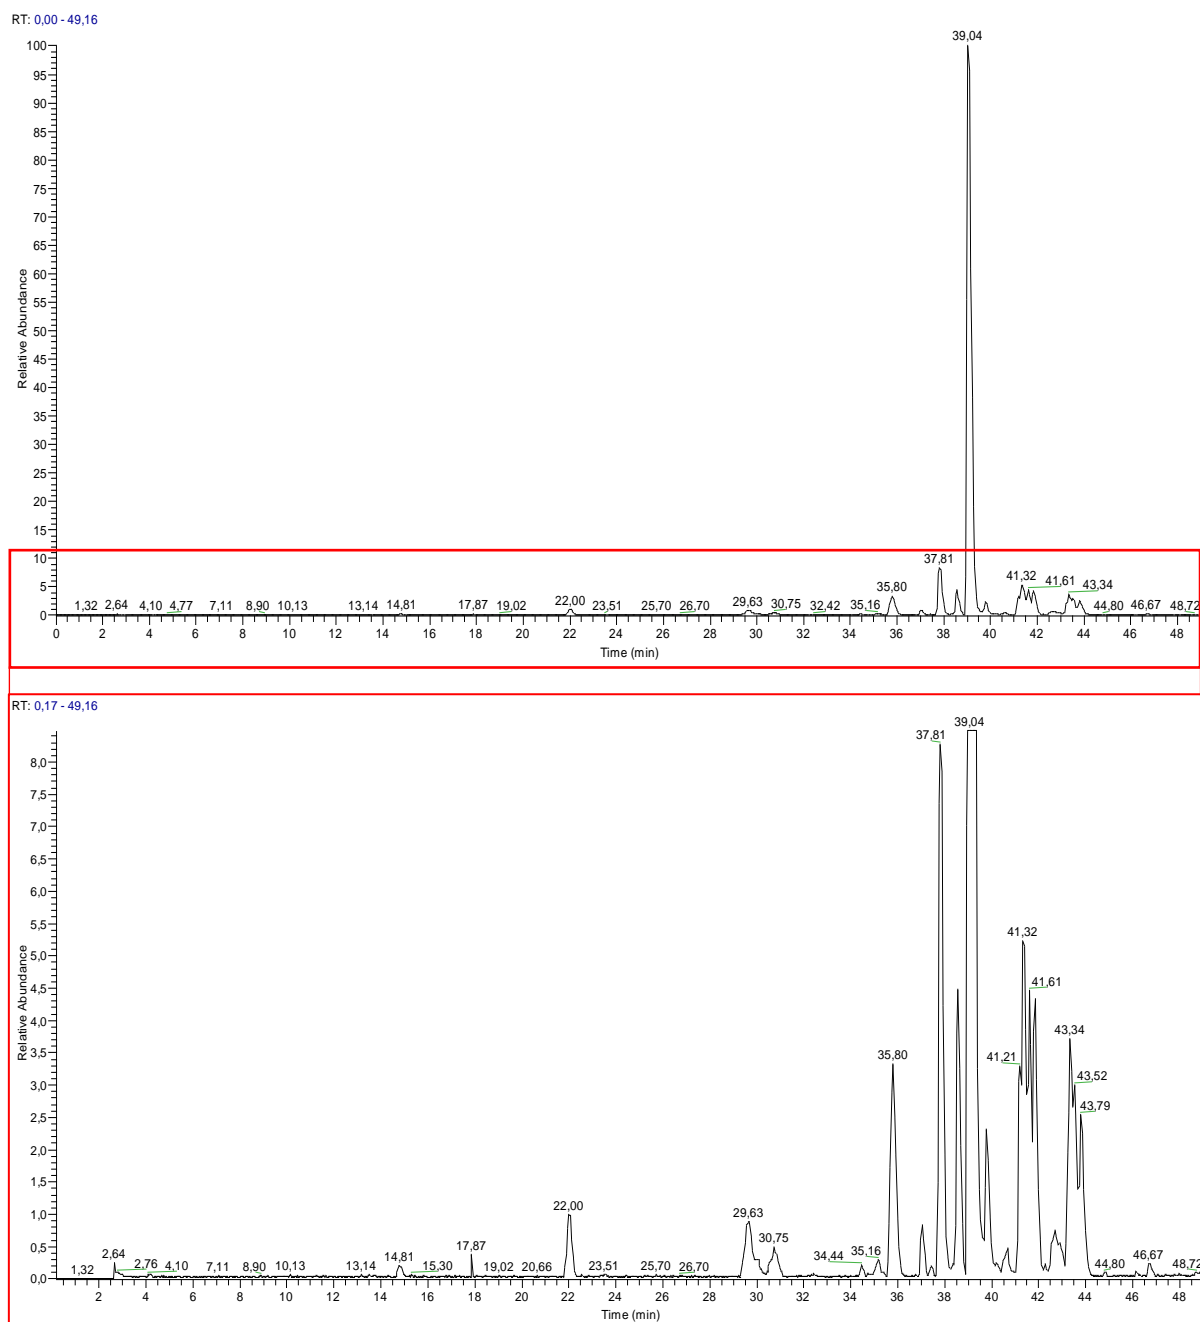

3

4

**Figure S2:** Neuroprotective capacity of the Mix under its native form at the same concentrations than the observed neuroprotection with the Mix Ox and Ole Ox.

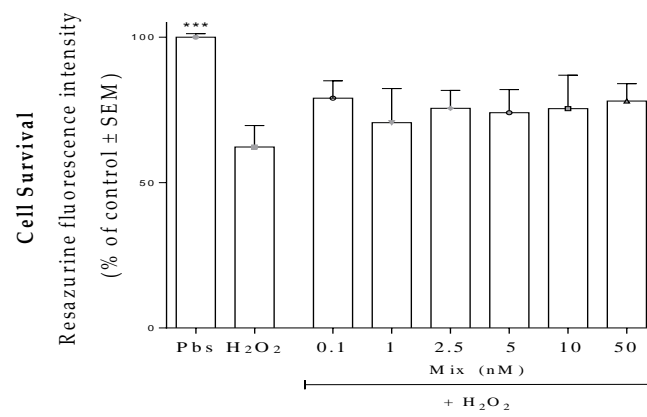

Supplement: biomolecules-09-00802-s001.pdf [file biomolecules-09-00802-s001.pdf]
